# SUMMARY OF PROCEEDINGS OF HOUSE OF DELEGATES OF THE AMERICAN SOCIETY OF ANESTHESIOLOGISTS, INC.

OLYMPIC HOTEL.

Seattle, Wash.

October 5-9, 1953

## PROCEEDINGS \*

### FIRST SESSION

9:00 a.m.—October 7, 1953

### DELEGATES PRESENT

#### Officers

|                           |                              |
|---------------------------|------------------------------|
| President                 | Ralph T. Knight, M.D.        |
| Immediate Past-President  | C. Walter Metz, M.D.         |
| President-elect           | Stevens J. Martin, M.D.      |
| First Vice President      | B. B. Sankey, M.D.           |
| Second Vice President     | Irving M. Pallin, M.D.       |
| Secretary                 | J. Earl Remlinger, Jr., M.D. |
| Treasurer                 | Moses H. Krakow, M.D.        |
| Chairman, Editorial Board | Henry S. Ruth, M.D.          |

#### Directors Representing Districts

|             |                               |
|-------------|-------------------------------|
| District 1  | Lewis H. Wright, M.D.         |
| District 7  | John F. Morris, M.D.          |
| District 9  | A. J. Ochsner, M.D.           |
| District 10 | Robert H. Haralson, Jr., M.D. |
| District 12 | Lawrence D. Ruttle, M.D.      |
| District 13 | Albert Faulconer, Jr., M.D.   |
| District 14 | Lucien E. Morris, M.D.        |
| District 15 | Paul H. Lorhan, M.D.          |
| District 16 | Werner F. Hoefflich, M.D.     |
| District 17 | Clayton P. Wangeman, M.D.     |
| District 18 | Paul A. Clayton, M.D.         |
| District 19 | Forrest E. Leffingwell, M.D.  |
| District 20 | Maxwell R. Palmer, M.D.       |
| District 22 | Rolland J. Whitacre, M.D.     |

Districts 2, 3, 4, 5, 6, 8, 11 and 21 were unrepresented.

#### State, Territorial and Provincial Delegates

|          |                          |
|----------|--------------------------|
| Alabama  | Unrepresented            |
| Arizona  | Mahlon D. Prickett, M.D. |
| Arkansas | Unrepresented            |

\* All exhibits have been eliminated from these printed Proceedings and are available from the Executive Offices of the Society.

|                      |                                                                                                                                                                                                                                 |
|----------------------|---------------------------------------------------------------------------------------------------------------------------------------------------------------------------------------------------------------------------------|
| California           | Elmer E. Brinckerhoff, M.D.<br>J. S. Denson, M.D.<br>Howard S. Downs, M.D.<br>Joseph H. Failing, M.D.<br>Woodrow E. Lomas, M.D.<br>Hermann B. Stein, M.D.                                                                       |
| Colorado             | Mario L. Garofalo, M.D.                                                                                                                                                                                                         |
| Connecticut          | Unrepresented                                                                                                                                                                                                                   |
| Delaware             | Robert R. Cross, M.D.                                                                                                                                                                                                           |
| District of Columbia | Ralph S. Sappenfield, M.D.                                                                                                                                                                                                      |
| Florida              | Perry P. Volpito, M.D.                                                                                                                                                                                                          |
| Georgia              | Roscoe L. Ward, M.D.                                                                                                                                                                                                            |
| Idaho                | Francis M. Grem, M.D.                                                                                                                                                                                                           |
| Illinois             | Max S. Sadove, M.D.                                                                                                                                                                                                             |
| Indiana              | Charles O. Hamilton, M.D.<br>Murwyn L. Hicks, M.D.                                                                                                                                                                              |
| Iowa                 | E. Parish Lovejoy, M.D.                                                                                                                                                                                                         |
| Kansas               | L. Lafe Bresette, M.D.                                                                                                                                                                                                          |
| Kentucky             | Unrepresented                                                                                                                                                                                                                   |
| Louisiana            | John Adriani, M.D.                                                                                                                                                                                                              |
| Maine                | Unrepresented                                                                                                                                                                                                                   |
| Maryland             | Unrepresented                                                                                                                                                                                                                   |
| Massachusetts        | M. Gene Black, M.D.<br>Daniel P. Johnson, M.D.<br>John H. Tueci, M.D.                                                                                                                                                           |
| Michigan             | W. G. Mackersie, M.D.                                                                                                                                                                                                           |
| Minnesota            | Unrepresented                                                                                                                                                                                                                   |
| Mississippi          | Unrepresented                                                                                                                                                                                                                   |
| Missouri             | Oral B. Crawford, M.D.                                                                                                                                                                                                          |
| Montana              | Unrepresented                                                                                                                                                                                                                   |
| Nebraska             | Samuel D. Miller, M.D.                                                                                                                                                                                                          |
| Nevada               | Unrepresented                                                                                                                                                                                                                   |
| New Hampshire        | Richard H. Barrett, M.D.                                                                                                                                                                                                        |
| New Jersey           | Unrepresented                                                                                                                                                                                                                   |
| New York             | Abraham Alpin, M.D.<br>Harold F. Bishop, M.D.<br>Vincent J. Collins, M.D.<br>S. G. Hershey, M.D.<br>C. M. Landmesser, M.D.<br>H. M. Ausberman, M.D.<br>A. J. Fisher, M.D.<br>A. William Friend, M.D.<br>George F. Collins, M.D. |
| North Carolina       | Howard A. Bennett, M.D.                                                                                                                                                                                                         |
| Ohio                 | David C. Boals, M.D.<br>Austin Lamont, M.D.<br>George J. Thomas, M.D.                                                                                                                                                           |
| Oklahoma             | Priscilla Sellman, M.D.                                                                                                                                                                                                         |
| Oregon               | Unrepresented                                                                                                                                                                                                                   |
| Pennsylvania         | Unrepresented                                                                                                                                                                                                                   |
| Rhode Island         | Mary Frances Poe, M.D.                                                                                                                                                                                                          |
| South Carolina       | Randall J. Brady, M.D.                                                                                                                                                                                                          |
| South Dakota         | John W. Winter, M.D.                                                                                                                                                                                                            |
| Tennessee            | Scott M. Smith, M.D.                                                                                                                                                                                                            |
| Texas                | Unrepresented                                                                                                                                                                                                                   |
| Utah                 |                                                                                                                                                                                                                                 |
| Vermont              |                                                                                                                                                                                                                                 |

Virginia  
Washington State  
West Virginia  
Wisconsin

Alaska  
Ontario  
Quebec  
British Columbia

Beverly Jones, M.D.  
John M. MacKinnon, M.D.  
Unrepresented  
Unrepresented

B. E. McBrayer, M.D.  
C. I. Junkin, M.D.  
Harold R. Griffith, M.D.  
Norman R. J. McMillen, M.D.

#### CALL TO ORDER

The First Session of the House of Delegates of the American Society of Anesthesiologists, Inc., was called to order by Ralph T. Knight, M.D., President of the Society and Chairman of the House of Delegates, at 9:15 a.m.

After welcoming the Delegates to the meeting, Doctor Knight stated that visitors and observers to the Proceedings of the House of Delegates were most welcome, but asked that they segregate themselves to the rear of the room.

#### ANNOUNCEMENT OF QUORUM PRESENT

Doctor Knight then called upon the representative of the Credentials Committee to announce whether a quorum was present. Doctor William Weiss, as that representative, announced that there were 66 Delegates present, which constituted a quorum to do business.

#### READING OF MINUTES OF LAST MEETING

The Chairman stated that the next order of business was the reading of the Minutes of the last meeting of the House of Delegates. Doctor Remlinger moved that the reading of those Minutes be dispensed with and that they be adopted as previously published and distributed. The motion was duly seconded by Doctor Lewis Wright and upon vote carried.

#### REPORT OF PRESIDENT

The President, Doctor Knight, then presented his report as President of the American Society of Anesthesiologists. A full, true and correct copy of that Report is attached [to the original copy of the Minutes] marked "Exhibit A" and made a part thereof. After reading his report, Doctor

Knight referred it to the Reference Committee on Officers Reports.

#### ANNOUNCEMENT

The Chairman then stated that he would refer all reports published in the Delegates Handbook to the proper Reference Committee without their being read to the members of the House of Delegates. He also pointed out that as these reports were referred, the Chairman of each Committee would be asked if he had a supplemental report.

#### REPORT OF CONSTITUTIONAL SECRETARY

The Report of the Constitutional Secretary, a full, true and correct copy of which is attached [to the original copy of the Minutes] marked "Exhibit CC" and made a part thereof, was referred to the Reference Committee on Officers Reports.

Following the reference of the Constitutional Secretary's Report, Doctor Remlinger made the following Supplemental Report:

"Mr. President, at a meeting of the Board of Directors yesterday, Kansas City was chosen as the site of the 1956 meeting and Detroit was chosen as the alternate site. Also, a panel was selected by the Board of Directors for your consideration to receive the Distinguished Service Award, composed of Doctors Rovenstine, Cullen and McCuskey."

This Supplemental Report of Doctor Remlinger was also referred to the Reference Committee on Officers Reports.

#### REPORT OF THE TREASURER

The Report of the Treasurer, a full, true and correct copy of which it attached [to the original copy of the Minutes] marked "Exhibit DD" and made a part thereof, was

referred to the Reference Committee on Officers Reports.

Following the reference of the Treasurer's Report, Doctor Krakow presented the following Supplemental Report, a full, true and correct copy of which is attached [to the original copy of the Minutes] marked "Exhibit EE" and made a part thereof, was also referred to the Reference Committee on Officers Reports.

#### REPORT OF EXECUTIVE SECRETARY

The Chair then called upon Mr. Hunt to present his Report as Executive Secretary of the Society, a full, true and correct copy of which is attached [to the original copy of the Minutes] marked "Exhibit FF" and made a part thereof.

#### DISTINGUISHED SERVICE AWARD

Doctor Knight announced that the next order of business was the selection of one of the candidates on the panel chosen by the Board of Directors and reported to the House of Delegates by the Constitutional Secretary to receive the 1953 Distinguished Service Award.

Following discussion of the matter by several members of the House of Delegates, Doctor Lucien Morris moved that the matter of the Distinguished Service Award be stricken out of the agenda at this point and placed in the order of new business. The motion was duly seconded by Doctor Lorhan and upon vote carried.

#### REPORT OF AMERICAN COLLEGE OF ANESTHESIOLOGISTS

Doctor Richard Barrett, Secretary of the Board of Governors of the American College of Anesthesiologists, then presented the Report of the College, a full, true and correct copy of which is attached [to the original copy of the Minutes] marked "Exhibit HH" and made a part thereof. Following the reading of this Report, the Chairman referred it to the Reference Committee on Standing Committee Reports.

#### REPORT OF CHAIRMAN OF THE EDITORIAL COMMITTEE

Doctor Ruth, Chairman of the Editorial Board and Editor of ANESTHESIOLOGY, then

presented the Report of the Editorial Committee, a full, true and correct copy of which is attached [to the original copy of the Minutes] marked "Exhibit GG" and made a part thereof. Following the reading of this Report, the Chairman referred it to the Reference Committee on Standing Committee Reports.

#### UNFINISHED BUSINESS

Doctor Robert R. Cross requested information as to what had become of a resolution introduced at the last meeting of the House of Delegates to the effect that it would be considered unethical for an anesthesiologist to allow a hospital to collect for his services and retain a portion of the amount so collected. He was advised by the Executive Secretary that the Summary of Proceedings of the 1952 Session of the House of Delegates indicated that the resolution was adopted.

Doctor George Collins then requested information from Doctor Ruth as to what had been done concerning a press release by the American Hospital Association to the effect that the recently adopted joint statement by the A.M.A. and A.H.A. suggested that the best way to collect medical fees was for the hospital to include them on the hospital bill. Before Doctor Ruth had an opportunity to answer this question, the President announced that it was necessary for the House of Delegates to recess in order to view a television show being presented as part of the program of the A.S.A. Annual Meeting. The House did recess at 10:50 a.m.

The meeting was again called to order by Doctor Ralph Knight, Chairman, at 11:30 a.m.

The Chairman then called upon Doctor Ruth to reply to Doctor George Collins' inquiry. Doctor Ruth reviewed the various statements that had been made in the press and stated that in his opinion the joint statement had not superseded the "Guides." Doctor Vincent Collins moved that the remarks of Doctor Ruth be accepted as points of information. The motion was duly seconded by Doctor Whitacre and upon vote carried.

# REPORT OF DELEGATES FOR THE SECTION ON ANESTHESIOLOGY TO THE HOUSE OF DELEGATES OF THE AMERICAN MEDICAL ASSOCIATION

Doctor Ruth, Delegate representing the Section on Anesthesiology to the House of Delegates of the American Medical Association, then presented his Report, a full, true and correct copy of which is attached [to the original copy of the Minutes] marked "Exhibit II" and made a part thereof. Following the reading of the Report, it was referred to the Reference Committee on Standing Committee Reports.

## NEW BUSINESS

Doctor Knight then called for any new business to be presented to the House of Delegates and stated that no discussion would be permitted on such new business until after it had been referred to the proper Reference Committee and reported back with that Committee's recommendations on the following day.

Doctor Grem of Illinois stated that he had been instructed by the Illinois Society of Anesthesiologists to present the following to the House of Delegates:

"The Illinois Society of Anesthesiologists disapproves in principle the participation of any member of the American Society of Anesthesiologists in the training of anesthesiology of any foreign medical graduate who does not meet the requirements of the State of Illinois for medical licensure, except if the foreign medical graduate so trained will reside in this country only for the duration of the training period."

The foregoing was referred to the Reference Committee on New Business by the Chairman.

Doctor A. William Friend of Ohio then stated that he had been instructed by the Ohio Society of Anesthesiologists to present the following resolution:

"Whereas, the House of Delegates of the American Medical Association in its principles of ethics and the particularization thereof in the 'Guides for Conduct of Physicians in Relationship with Institutions' has stated that it is unethical for a physician to allow his services to be disposed of for a fee by any hospital, corporation or other lay body; and

Whereas, the House of Delegates of the American Medical Association has recently reaffirmed this principle by approving the joint statement of principles by the A.M.A. and the American Hospital Association with the express statement that the general principles there set out are more specifically stated in the 'Guides'; and

Whereas, the House of Delegates of the American Society of Anesthesiologists has heretofore, by its Statement of Policy, expressed its concurrence in the principles adopted by the A.M.A., and

Whereas, the Board of Regents of the American College of Surgeons has taken exception to the A.S.A. Statement of Policy in a recent communication to the A.S.A.; and it has been stated that our policy no longer represents the considered judgment of anesthesiologists; and

Whereas, the Statement of Policy does now represent the considered policy of this Society, now, therefore be it

RESOLVED, that this House of Delegates does hereby reaffirm that the Statement of Policy does represent the policy of this Society."

Following the presentation of this resolution, it was referred to the Reference Committee on New Business.

Doctor Austin Lamont of Pennsylvania, then presented the resolution, a full, true and correct copy of which is attached hereto marked "Exhibit JJ" and made a part hereof. Following the presentation of this resolution, it was referred to the Reference Committee on New Business for consideration.

## ANNOUNCEMENT AS TO ELECTION OF DIRECTORS AND ALTERNATE DIRECTORS

Doctor Knight then announced that all vacancies on the Board of Directors must be filled prior to the Second Session of the House of Delegates.

## ANNOUNCEMENT

The Chairman then announced the time and place of the meeting of the various Reference Committees.

## RECESS

There being no further business to come before this Session of the House of Delegates, it recessed at 12:45 p.m. to reconvene at 9:00 a.m. on the following day.

## SECOND SESSION

(Morning Meeting)

9:00 a.m.—October 8, 1953

## DELEGATES PRESENT

## Officers

President  
Immediate Past-President  
President-elect  
First Vice President  
Second Vice President  
Secretary  
Treasurer  
Chairman, Editorial Board

Ralph T. Knight, M.D.  
C. Walter Metz, M.D.  
Stevens J. Martin, M.D.  
B. B. Sankey, M.D.  
Irving M. Pallin, M.D.  
J. Earl Remlinger, Jr., M.D.  
Moses H. Krakow, M.D.  
Henry S. Ruth, M.D.

District Directors present were those recorded for the First Session with the following exceptions: District 8 was represented by Ralph S. Sappenfield, M.D. District 22 was unrepresented.

State, Territorial and Provincial Delegates present were those recorded for the first session with the following exceptions: Florida and Virginia were unrepresented. Illinois was represented by Mary Karp, M.D. for Max S. Sadove, M.D.; Louisiana by Jacob O. Hoth, M.D. in addition to John Adriani, M.D.; Minnesota was represented by Frederick H. Van Bergen, M.D.; New York was represented by John A. Kalb, M.D. and Irving M. Pallin, M.D. in addition to the representatives listed for the first session; North Carolina was represented by John C. Montgomery, M.D. in addition to H. M. Ausherman, M.D.; Oregon was represented by Charles E. Gray, M.D. in addition to David C. Boals, M.D. and British Columbia was represented by John J. Carroll, M.D. in place of Norman R. J. McMillen, M.D.

## CALL TO ORDER

The meeting was called to order by Doctor Knight, President of the A.S.A. and Chairman of the House of Delegates, at 9:10 a.m., Thursday, October 8, 1953.

## ANNOUNCEMENT OF QUORUM

At the request of the Chairman, Doctor Tucci, a representative of the Committee on

Credentials, announced that there were 47 Delegates present, which constituted a quorum to do business.

## REPORT OF REPRESENTATIVE ON AMERICAN BOARD OF ANESTHESIOLOGY

Doctor Knight then called upon Doctor Frederick P. Haugen, as Representative of the American Society of Anesthesiologists on the American Board of Anesthesiology, to present a Report on the activities of the Board. Doctor Haugen presented that Report, a full, true and correct copy of which is attached [to the original copy of the Minutes] marked "Exhibit KK" and made a part thereof.

Following the presentation of this Report, Doctor Vincent Collins moved that the Report be accepted for informative purposes and made a part of the records of the meeting. The motion was duly seconded by Doctor Wangeman and upon vote carried.

## REPORT OF SELECTION OF DIRECTORS AND ALTERNATE DIRECTORS

At the request of the Chairman, Doctor John H. Tucci, as Representative of the Credentials Committee, announced that the following Directors and Alternate Directors had been properly selected to fill vacancies that occurred on the Board of Directors:

| District | Director                    | Alternate Director          |
|----------|-----------------------------|-----------------------------|
| 4        | Frank D'Andrea, M.D.        | Edward Damarjian, M.D.      |
| 5        | Robert L. Patterson, M.D.   |                             |
| 7        | William E. Bageant, M.D.    | Norman H. Newhouse, M.D.    |
| 8        | David A. Davis, M.D.        | C. R. Stephen, M.D.         |
| 9        | John Adriani, M.D.          | A. J. Ochsner, M.D.         |
| 13       | John W. Pender, M.D.        | Albert Faulconer, Jr., M.D. |
| 20       | C. Clark Leydie, M.D.       |                             |
| 21       | Norman R. J. McMillen, M.D. |                             |

The Chair then declared them elected.

#### REPORT OF REFERENCE COMMITTEE ON STANDING COMMITTEE REPORTS

Doctor Knight, Chairman, called upon Doctor Failing, Chairman of the Reference Committee on Standing Committee Reports, to present the Report of that Committee.

Doctor Failing announced that the Reference Committee on Standing Committee Reports had held open hearings since the First Session of the House of Delegates and heard all those interested in matters pending before the Committee. The Committee has taken into consideration the matters presented by members of the Society and after considering them, presents the following report:

#### Report of the Committee on Constitution, By-laws and Rules

The first portion of the Report of the Committee on Constitution, By-laws and Rules (Exhibit B) considered by the Committee was that which appears under the heading "Unfinished Business":

"The Reference Committee has carefully considered the proposed Amendment to Article XI, Section 2 of the Constitution which was read to the House of Delegates at its last meeting. After such consideration the Reference Committee feels that there are such discrepancies in the proposed Amendment of such fundamental nature that it should not be passed by the House of Delegates at this time. Therefore, the Committee recommends that the proposed Amendment be referred to the Committee on Constitution and By-laws for further study and that that Committee report back to the House of Delegates on this subject at its next Annual Meeting."

Doctor Failing then moved the adoption of this portion of the Report of the Reference Committee on Standing Committee Re-

ports. The motion was duly seconded by Doctor Lewis Wright. After considerable discussion of the motion, the question was called for and a vote was taken. There being a question in the mind of the Chairman as to the outcome of the vote, a standing vote was taken. On the standing vote, the motion was carried.

Doctor Irving Fallin then moved that unanimous consent of the House of Delegates be given to suspend the order of business and permit new business to be presented at this time. The motion was duly seconded by Doctor Lewis Wright and upon vote unanimous consent was not obtained.

Doctor Failing then reported upon the proposed amendment to Chapter I, Section 1d of the By-laws as follows:

"Proposed Amendment: Doctors of Medicine who are interested in the advancement of anesthesiology but who are not engaged in the clinical practice of anesthesiology.

The Reference Committee recommends its adoption. I move the adoption of this portion of the report of the Reference Committee."

The motion was duly seconded by Doctor Lewis Wright and upon vote carried.

Doctor Failing then reported on the proposed change to Article IV, Section 4 of the Constitution, and stated that the Committee recommended its adoption. Doctor Failing then moved the adoption of this Report. The motion was seconded by Doctor Lewis Wright and upon vote was unanimously carried.

Doctor Failing then reported with reference to the proposed addition of a new By-law to be designated as Chapter I, Section 1e, as follows:

"The Committee, after due consideration, wishes to amend the proposed new By-law as

follows: Doctors of Medicine who have been active members in good standing for a period of 10 years upon reaching the age of 65, or are permanently disabled, may have the privilege of applying for retired membership in the Society. Retired members shall not be subject to dues or assessments, except as otherwise provided for in the Constitution and By-laws, but shall be accorded all the rights and privileges of active membership except voting and holding office."

The motion was duly seconded by Doctor Whitacre and after discussion it was upon vote carried.

Doctor Failing then stated that the Reference Committee on Standing Committee Reports recommended the proposed amendment to Article IV, Section 1 of the Constitution as set forth in the Report of the Committee on Constitution, By-laws and Rules (Exhibit B) and moved the adoption of this portion of the Report. The motion was duly seconded by Doctor Vincent Collins. After considerable discussion the motion was carried by a two-thirds vote of the Delegates present.

Doctor Failing then stated that the Reference Committee on Standing Committee Reports recommended the adoption of the proposed amendment to Section 7, Chapter IV of the By-laws as set forth in the Report of the Committee on Constitution, By-laws and Rules (Exhibit B) and moved the adoption of this section of the Report. The motion was duly seconded by Doctor Werner Hoeflich and upon vote carried.

Doctor Failing then stated that the Reference Committee on Standing Committee Reports recommended that the proposed change in Article V, Section 1 of the Constitution be amended to read as follows:

"Section 1. The House of Delegates shall be the primary legislative and governing body of this Society, and shall consist of the duly elected Delegates and the Officers, Directors, the Chairman of the Editorial Board, and the Immediate Past-President of this Society. All other Past-Presidents shall be members of the House of Delegates, but without vote."

be accepted as read. The motion was duly seconded by Doctor Randall J. Brady and was adopted by a two-thirds vote of the delegates present.

Doctor Failing then stated that the Reference Committee on Standing Committee Reports recommended that the proposed amendment to Article VII, Section 1 of the Constitution be reworded as follows:

"Section 1. The Board of Directors shall consist of one Director from each Director District, and the President, the President-elect, the Immediate Past-President, the First and Second Vice Presidents, the Secretary, the Treasurer, the Chairman of the Editorial Board, and the Chairman of the Board of Governors of the American College of Anesthesiologists. The Speaker and Vice-Speaker shall be members of the Board of Directors but shall have no vote either in the Board of Directors or in the House of Delegates."

and that it be adopted as so reworded. Doctor Failing then moved the adoption of this portion of the Report of the Reference Committee. The motion was duly seconded by Doctor Lewis Wright. After extended discussion of the motion, it was adopted by a two-thirds vote of the delegates present.

Doctor Failing then stated that the Reference Committee on Standing Committee Reports recommended the adoption of the amendment to Article XI, Section 1 of the Constitution as set forth in the Report of the Committee on Constitution, By-laws and Rules (Exhibit B). Doctor Failing then moved the adoption of this section of the Report. The motion was duly seconded by Doctor Wright and was adopted by a two-thirds vote of the Delegates present.

Doctor Failing then announced that no action be taken on the proposed amendment to Chapter IV, Section 7 of the By-laws as proposed in the Report of the Committee on Constitution, By-laws and Rules, as the matter had already been covered in a previous amendment already adopted by this Session of the House of Delegates. The motion was seconded by Doctor Lewis Wright and upon vote carried.

Doctor Failing then stated that the Reference Committee on Standing Committee Reports suggested that two new sections to be designated as Section 5 and Section 6 of Chapter VI of the By-laws in the form hereinafter set forth be inserted after Section 4 of Chapter VI of the By-laws be



adopted, and that the present Sections 5 through 7 of that Chapter of the By-laws be renumbered consecutively, beginning with Section 7. The proposed new Sections 5 and 6 are as follows:

"Section 5. The Speaker shall preside at all meetings of the House of Delegates.

Section 6. The Vice-Speaker shall perform the duties of the Speaker when requested to do so, or in case of the absence, death, resignation or refusal of the Speaker to act."

Doctor Failing then moved the adoption of this portion of the Report. The motion was duly seconded by Doctor Vincent Collins and upon vote carried.

#### Report of the Committee on Credentials

Doctor Failing then stated that the Reference Committee on Standing Committee Reports recommended that the Report of the Sub-Committee on Economics (Exhibit E) be accepted. Doctor Failing moved the adoption of this portion of the Report. The motion was duly seconded by Doctor Sankey and upon vote carried.

#### Report of the Sub-Committee on Economics

Doctor Failing then stated that the Reference Committee on Standing Committee Reports recommended that the Report of the Sub-Committee on Economics (Exhibit E) be accepted. Doctor Failing moved the adoption of this portion of the Report. The motion was duly seconded by Doctor Sankey and upon vote carried.

#### Report of the Committee on Public Policy, Public Relations and Economics

The Chairman of the Reference Committee on Standing Committee Reports then stated that that Committee recommended the approval of the Report presented by Doctor Sankey (Exhibit D) and made a motion to that effect. The motion was duly seconded and upon vote carried.

#### Report of the Committee on Liaison with the Wood Library-Museum of Anesthesiology

Doctor Failing then reported that the Reference Committee on Standing Committee Reports recommended that the Re-

port of the Committee on Liaison with the Wood Library-Museum of Anesthesiology (Exhibit F) be adopted. The motion was duly seconded by Doctor Hershey and upon vote carried.

#### Report of the Committee on Medical Schools and Postgraduate Education

After complimenting the Committee on Medical Schools and Postgraduate Education for their excellent Report (Exhibit G), Doctor Failing stated that the Reference Committee on Standing Committee Reports moved that the Report, together with recommendations A, B, E, and F be accepted and that recommendations C and D would be taken up separately. The motion was seconded by Doctor John Winter and upon vote carried.

#### Report of Sub-Committee on Medical Schools

Doctor Failing stated that the Reference Committee on Standing Committee Reports felt that this was an excellent presentation and recommended that the first recommendation of the Sub-Committee on Medical Schools (Exhibit I) be accepted. He further stated that the Reference Committee felt that the second recommendation of the Sub-Committee should not be adopted, for the reason that it would be a duplication of information already available both in the Journal of the American Medical Association and in the files of the A.S.A. Headquarters, and hence would create an unjustifiable expense. He then moved the adoption of this section of the Report. The motion was seconded by Doctor Sankey and upon vote carried.

#### Report of Sub-Committee on Instruction of General Practitioners Doing Part-Time Anesthesia

The Chairman of the Reference Committee then stated that that Committee recommended the adoption of the Report of the Sub-Committee on Instruction of General Practitioners Doing Part-Time Anesthesia (Exhibit J) and moved the adoption of this section of the Report. The motion was duly seconded by Doctor Lewis Wright and upon vote carried.

### Report of Sub-Committee on Clinical Instruction

The Chairman of the Reference Committee on Standing Committee Reports next stated that his Committee recommended the adoption of the Report of the Sub-Committee on Clinical Instruction (Exhibit K) and moved the adoption of this section of the Report. The motion was seconded by Doctor Lewis Wright and upon vote carried.

### Report of Membership Committee

The Report of the Committee on Membership (Exhibit L) was favorably received by the Reference Committee on Standing Committee Reports and Doctor Failing moved its acceptance. The motion was duly seconded by Doctor Lewis Wright and upon vote carried.

### Report of Judicial Committee

The next report considered by the Reference Committee on Standing Committee Reports was that of the Judicial Committee (Exhibit M). Doctor Failing moved the acceptance of this Report. The motion was duly seconded by Doctor Lewis Wright and upon vote carried.

### Report of the Program Committee

Doctor Failing stated that the Reference Committee on Standing Committee Reports had carefully considered the Report of the Program Committee (Exhibit N) and recommended its adoption. He made a motion to that effect, which was duly seconded by Doctor Lewis Wright and upon vote carried.

### Report of Chairman of the Editorial Committee

Doctor Failing complimented Doctor Ruth upon his Report as Chairman of the Editorial Committee of the American Society of Anesthesiologists and moved that the Report (Exhibit GG) be accepted. The motion was duly seconded and upon vote carried.

### Report of the Delegate from the Section on Anesthesiology to the American Medical Association

Doctor Failing also moved that the Report of Doctor Ruth as Delegate from the

Section on Anesthesiology to the American Medical Association (Exhibit II) be accepted. The motion was duly seconded and upon vote carried.

### Report of the American College of Anesthesiologists

The next item of business reported upon by the Chairman of the Reference Committee on Standing Committee Reports was the Report of the American College of Anesthesiologists (Exhibit III). Doctor Failing stated that the Reference Committee recommended that this Report be accepted and moved the adoption of this section of the Report. The motion was duly seconded and upon vote carried.

The foregoing having completed all of the matters assigned to the Reference Committee on Standing Committee Reports, Doctor Failing moved the adoption of that Report, as amended. The motion was duly seconded and upon vote carried.

### REPORT OF REFERENCE COMMITTEE ON SPECIAL COMMITTEE REPORTS

Doctor Knight, Chairman, then called upon Doctor Richard Barrett to present the Report of the Reference Committee on Special Committee Reports.

### Report of Committee on Awards and Honors

Doctor Barrett reported that the Reference Committee on Special Committee Reports moved the adoption of the Report of the Committee on Awards and Honors (Exhibit O) with an amendment to the second sentence, paragraph numbered one, to read:

"This should be read before the first meeting of the House of Delegates to permit them to study and evaluate the qualifications of the individual candidates before their vote"

and moved the adoption of the Report as amended. The motion was duly seconded by Doctor Lewis Wright and upon vote carried.

### Report of Committee on Clinical Records

Doctor Barrett then reported that the Reference Committee of which he was Chairman, moved the acceptance of the Re-

port of the Committee on Clinical Records (Exhibit P). The motion was duly seconded by Doctor George Thomas and upon vote carried.

#### Report of Committee on Hospital Hazards and Standardization of Anesthesia and Resuscitating Equipment

Doctor Barrett reported that the Reference Committee on Special Committee Reports moved the acceptance of the Report of the Committee on Hospital Hazards and Standardization of Anesthesia and Resuscitating Equipment (Exhibit Q). The motion was duly seconded by Doctor Lewis Wright and upon vote carried.

#### Report of Sub-Committee on Anesthesia Equipment

Doctor Barrett announced that the Reference Committee on Special Committee Reports recommended the adoption of the Report of the Sub-Committee on Anesthesia Equipment (Exhibit R) with the sentence in the second paragraph amended as follows:

"Legal liability will rest with an anesthesiologist using a machine incompletely equipped and lacking the safety mechanism."

Doctor Barrett then moved the adoption of the Report of the Sub-Committee as amended. The motion was duly seconded by Doctor Pallin and upon vote carried.

#### Report of Sub-Committee on Resuscitating Equipment

Doctor Barrett announced that the Reference Committee on Special Committee Reports moved the acceptance of the Report of the Sub-Committee on Resuscitating Equipment (Exhibit S). The motion was duly seconded by Doctor Lewis Wright and upon vote carried.

#### Report of Committee on Motion Picture Reviews

Doctor Barrett then moved the adoption of the Report of the Committee on Motion Picture Reviews (Exhibit U). The motion was duly seconded by Doctor Lewis Wright and upon vote carried.

#### Report of Committee on Liaison With Other Organizations

Doctor Barrett reported that the Reference Committee on Special Committee Reports moved the adoption of the Report of the Committee on Liaison with Other Organizations (Exhibit V). The motion was duly seconded by Doctor Paul Lorhan and upon vote carried.

#### Report of Committee on Research Fellowships

Doctor Barrett then reported that the Reference Committee on Special Committee Reports moved the adoption of the Report of the Committee on Research Fellowships (Exhibit W). The motion was duly seconded by Doctor Irving Pallin and upon vote carried.

#### Report of Committee on Liaison With the American Board of Anesthesiology

Doctor Barrett then announced that the Reference Committee on Special Committee Reports moved the adoption of the Report of the Committee on Liaison with the American Board of Anesthesiology (Exhibit X). The motion was seconded by Doctor Lewis Wright and upon vote carried.

#### Report of Committee to Advise on Production of Anesthesia Films

Doctor Barrett then reported that the Reference Committee on Special Committee Reports moved the adoption of the Report of the Committee to Advise on the Production of Anesthesia Films (Exhibit Y). The motion was seconded by Doctor Lewis Wright and upon vote carried.

#### Report of Committee on Scientific Exhibit

Doctor Barrett then announced that the Reference Committee on Special Committee Reports moved the adoption of the Report of the Committee on Scientific Exhibit (Exhibit Z). The motion was seconded by Doctor Lewis Wright and upon vote carried.

#### Report of Committee on Armed Forces

Doctor Barrett announced that the Reference Committee on Special Committee Reports moved the adoption of the Report of

the Committee on Armed Forces (Exhibit AA). The motion was seconded by Doctor Lewis Wright and upon vote carried.

#### Report of Committee on Hospital Construction

Doctor Barrett then announced that the Reference Committee on Special Committee Reports moved the adoption of the Report of the Committee on Hospital Construction (Exhibit BB). The motion was seconded by Doctor George Thomas and upon vote carried.

Doctor Barrett then moved the adoption of the Report of the Reference Committee on Special Committee Reports as a whole. The motion was duly seconded by Doctor Wright and upon vote carried.

#### REPORT OF REFERENCE COMMITTEE ON OFFICERS REPORTS

The Chairman then called upon Doctor E. Parish Lovejoy, Chairman of the Reference Committee on Officers Reports, to present the recommendations of that Committee.

#### President's Report

"The Committee on Reports of Officers, consisting of Dr. M. Gene Black, Dr. Charles Wycoff and myself (Dr. Lovejoy) has given careful consideration to all matters brought before it. It is our opinion that the present officers of the American Society of Anesthesiologists deserve the highest commendation for the many hours of effort they have spent on behalf of the society.

Only one suggestion was brought before the Committee, namely that the Report of the President, in future years, should be published in the Handbook for Delegates. However, it was the considered opinion of this committee that the President should be accorded the privilege of addressing us in person at the first session of the House of Delegates as he has done.

Therefore the committee recommends the approval of the President's Report. I move the adoption of the Report of the President as submitted."

The motion was duly seconded by Doctor Sankey and upon vote carried.

#### Report of the Constitutional Secretary

Doctor Lovejoy then reported that the Reference Committee on Officers Reports had carefully considered the Report (Exhibit CC) and Supplemental Report of the Constitutional Secretary, and in addition had collected information concerning each of the persons considered for the Distinguished Service Award. Doctor Lovejoy presented this information to the House of Delegates and then moved that the Report and Supplemental Report of the Constitutional Secretary be adopted. The motion was duly seconded by Doctor Rolland Whitacre and upon vote carried.

#### Report of the Treasurer

Doctor Lovejoy then reported that the Reference Committee on Officers Reports had approved the Report (Exhibit DD) and Supplemental Report (Exhibit EE) of the Treasurer and moved their adoption. The motion was duly seconded by Doctor Lewis Wright and upon vote carried.

Doctor Lovejoy then moved that the Report of the Reference Committee on Officers Reports be adopted as a whole. The motion was duly seconded by Doctor Lewis Wright and upon vote carried.

#### SELECTION OF RECIPIENT OF DISTINGUISHED SERVICE AWARD

Doctor Knight, Chairman, then stated that the next order of business would be the selection of the Recipient of the 1953 Distinguished Service Award from the American Society of Anesthesiologists. A vote was taken by written ballot. The tellers appointed by the Chairman to count the ballots were Doctors C. Walter Metz and A. William Friend. As a result of the election, Doctor Charles F. McCuskey was selected as the Recipient of the Distinguished Service Award for 1953.

#### RECESS

The hour having reached 12:30 p.m., the House of Delegates recessed to reconvene at 2:30 p.m. on the same day.

## SECOND SESSION

(Afternoon Meeting)

2:30 p.m.—October 8, 1953

## DELEGATES PRESENT

## Officers

President  
Immediate Past-President  
President-elect  
First Vice President  
Second Vice President  
Secretary  
Treasurer  
Chairman, Editorial Board

Ralph T. Knight, M.D.  
C. Walter Metz, M.D.  
Stevens J. Martin, M.D.  
B. B. Sankey, M.D.  
Irving M. Pallin, M.D.  
J. Earl Remlinger, Jr., M.D.  
Moses H. Krakow, M.D.  
Henry S. Ruth, M.D.

District Directors present were those recorded for the First Session with the following exception: District 7 was unrepresented.

State, Territorial and Provincial Delegates present were those recorded for the first session with the following exceptions: Connecticut, Georgia, Oklahoma, Virginia, British Columbia and Ontario were unrepresented. Illinois was represented by Francis M. Grem, M.D.; Minnesota by Frederick H. Van Bergen, M.D.; New York was represented by John A. Kulb, M.D. and Irving M. Pallin, M.D. in addition to the representatives listed for the first session. Oregon was represented by Charles E. Gray, M.D. for David C. Boals, M.D.

## CALL TO ORDER

The meeting was called to order by the Chairman, Doctor Knight, at 2:40 p.m.

## ANNOUNCEMENT OF QUORUM

The Chairman called upon Doctor Arrowood, Chairman of the Committee on Credentials, to announce whether a quorum was present to do business. Doctor Arrowood stated that there was a quorum present to do business.

## ELECTION OF OFFICERS

Doctor Knight then declared the next order of business was the election of Officers. The Chairman appointed Doctors Metz and Friend to act as tellers for the purposes of these elections.

## Election of President-Elect

Doctor Knight then declared nominations open for the office of President-elect of the American Society of Anesthesiologists.

Doctor Metz nominated Doctor B. B. Sankey for the office of President-elect. The nomination was seconded by Doctor George Collins.

There being no further nominations, Doctor Krakow moved that the nominations be closed. The motion was seconded by Doctor Paul Lorhan and upon vote carried. Doctor Sankey was declared elected to the office of President-elect. Doctor Lafe Bresette then moved that the Secretary be instructed to cast a unanimous ballot for Doctor Sankey. The motion was duly seconded by Doctor Stevens Martin and upon vote carried.

## Election of First Vice President

Doctor Knight then declared nominations for the First Vice President to be open.

Doctor Wangeman nominated Doctor Daniel C. Moore for First Vice President. The nomination was seconded by Doctor J. S. Denon.

Doctor Landmesser nominated Doctor James Ekenhoff for First Vice President. The nomination was seconded by Doctor Austin Lamont.

There being no further nominations, Doctor Whitacre moved the nominations be closed. The motion was seconded by Doctor Krakow and upon vote carried.

The Chair asked the Tellers to officiate and after vote by secret written ballot it was announced that Doctor Daniel C. Moore of Seattle had been elected First Vice President.

#### Election of Second Vice President

Doctor Knight then declared nominations for the Second Vice President to be open.

Doctor Lovejoy nominated Doctor Paul H. Lorhan for Second Vice President. The nomination was seconded by Doctor Lafe Bresette.

There being no further nominations, Doctor Krakow moved the nominations be closed. The motion was seconded by Doctor Oral B. Crawford and upon vote carried. Doctor Lorhan was declared elected to the office of Second Vice President.

Doctor Lafe Bresette then moved that the Secretary be instructed to cast a unanimous ballot for Doctor Lorhan. The motion was duly seconded by Doctor B. E. McBrayer and upon vote carried.

#### Election of Constitutional Secretary

Doctor Krakow nominated Doctor J. Earl Remlinger for the office of Constitutional Secretary. The nomination was seconded by Doctor Maxwell Palmer.

There being no further nominations, Doctor Vincent Collins moved the nominations be closed. The motion was seconded by Doctor Werner Hoeflich and upon vote carried. Doctor Remlinger was then declared re-elected to the office of Constitutional Secretary.

#### Election of Treasurer

Doctor Vincent Collins nominated Doctor Moses H. Krakow for the office of Treasurer. The nomination was seconded by Doctor Paul Lorhan.

There being no further nominations, Doctor Wright moved the nominations be closed. The motion was seconded by Doctor Fisher and upon vote was unanimously carried. Doctor Krakow was then declared re-elected to the office of Treasurer.

#### First Speaker—House of Delegates

Doctor Knight then declared nominations for the First Speaker of the House of Delegates to be open.

Doctor Lewis Wright nominated Doctor Forrest Leffingwell for First Speaker of the House of Delegates of the A.S.A. The nomination was seconded by Doctor A. William Friend.

There being no further nominations, Doctor Lafe Bresette moved the nominations be closed. The motion was seconded by Doctor Maxwell Palmer and upon vote was unanimously carried. Doctor Leffingwell was then declared by the Chair to be the First Speaker of the House of Delegates.

#### Vice-Speaker—House of Delegates

Doctor Knight then declared nominations for the Vice-Speaker of the House of Delegates to be open.

Doctor Krakow nominated Doctor Vincent Collins for Vice-Speaker of the House of Delegates. The nomination was seconded by Doctor Rolland Whitacre.

Doctor John Adriani nominated Doctor Ralph Sappenfield for Vice-Speaker of the House of Delegates. The nomination was seconded by Doctor Lafe Bresette.

The Chair then asked the Tellers to officiate and after vote by secret written ballot it was announced that Doctor Ralph Sappenfield had been elected Vice-Speaker of the House of Delegates.

#### REPORT OF REFERENCE COMMITTEE ON NEW BUSINESS

The Report of the Reference Committee on New Business was presented by Doctor Irving Pallin.

#### Resolution by Doctor Austin Lamont

After reading the Resolution presented by Doctor Austin Lamont (Exhibit JJ) on the previous day, Doctor Pallin reported the recommendation of the Reference Committee as follows:

"Dr. Lamont's resolution is based upon the premise that the Report of the Joint Committee of Hospital-Physician Relationships of the Boards of Trustees of the A.M.A. and A.H.A. conflicts with the Statement of Policy of the A.S.A. and abrogates the Guides for the Conduct of Physicians in Relationship with Institutions.

This Committee (Reference Committee on New Business) has carefully studied these three statements and is of the opinion there is no conflict among them.

The Report of the Joint Committee is in very general language. It follows almost verbatim the language of the Canons of Ethics (Chapter III, Art. VI, Sec. 6) which formed the basis of the 'Guides.' The 'Guides' and the A.S.A. Statement of Policy cover a specific application of this language and is in harmony with it. This conclusion of your Committee is confirmed by the Report of the Reference Committee of the House of Delegates of the A.M.A. which recommended the adoption of the report of the Joint Committee:

'This excellent report presents a general statement of the principles which in some respects are more specifically stated in the "Guides for the Conduct of Physician-Hospital Relationships."'

The A.M.A. House of Delegates approved this report in June of 1953.

Your Committee recommends the defeat of Doctor Lamont's resolution. I move the adoption of this section of the report."

The motion was duly seconded by Doctor Maxwell Palmer and upon vote carried.

#### Resolution of Doctor Friend

Doctor Pallin next discussed the resolution by Doctor A. William Friend which was presented on the previous day, with reference to the Statement of Policy of the American Society of Anesthesiologists. He stated that the Committee recommended the adoption of the resolution with the first two paragraphs thereof amended to read as follows:

"Whereas the House of Delegates of the American Medical Association and its Principles of Ethics and the particularization thereof in the 'Guides for Conduct of Physicians in Relationships with Institutions' has stated that a physician should not dispose of his professional attainments or services to any hospital, corporation, or lay body, by whatever name called, or however organized, under terms or conditions which permit the service of that physician to be sold by such agency for a fee, and

Whereas, the House of Delegates of the American Medical Association has recently recognized the continued validity of this principle by approving the Joint Statement of the Principles of the American Medical Association and the American Hospital Association with the expressed statement that the general principles there set out are more specifically stated in the 'Guides. . . ."

After reading the foregoing amended paragraphs, Doctor Pallin moved the adoption of this portion of the Report. The motion was duly seconded by Doctor Lewis Wright.

Following this, Doctor Oral B. Crawford moved that the motion be tabled. The motion was seconded by Doctor L. Lafe Bresette and upon vote the motion to table was lost.

A vote was then taken upon the original motion and upon vote carried.

#### Resolution of Doctor Grem

Doctor Pallin next read the resolution presented on the preceding day by Doctor Francis Grem, which appears in the Minutes of the preceding day, and stated that the Committee agrees in principle with the resolution and recognizes the growing magnitude of this problem. The Committee therefore recommends that this resolution be referred to an *ad hoc* committee for further recommendation. Doctor Pallin then moved the adoption of this section of the Report. The motion was duly seconded by Doctor Lawrence Ruttle and upon vote carried.

Doctor Pallin then moved the adoption of the Report of the Reference Committee on New Business as a whole. The motion was seconded by Doctor Lewis Wright and upon vote carried.

#### ADDITIONAL NEW BUSINESS

Doctor Robert Haralson then asked for unanimous consent of the House to introduce a suggested amendment to Article 18 of the Constitution, so that it could be considered as a first reading and be voted upon in 1954. Upon vote such unanimous consent was granted.

Following the granting of unanimous consent, Doctor Haralson presented a proposed change in Article XVIII of the Constitution whereby all of the language following the word "Anesthesiology" would be deleted and following the word "Anesthesiology" that the words be substituted:

"and twice in the News Letter"

Doctor Haralson then moved that the foregoing be accepted as a first reading of

the proposed amendment to the Constitution. The motion was seconded by Doctor Lucien Morris and upon vote carried.

#### INTRODUCTION OF NEW PRESIDENT

Doctor Knight then introduced Doctor Stevens J. Martin as the new President of the Society. Doctor Martin made a few brief remarks, at the conclusion of which he presented to Doctor Knight a gavel in appreciation of Doctor Knight's services to the Society during the past year.

Doctor Knight then resumed the Chair.

Doctor Knight accepted the gavel and expressed a few words of appreciation.

#### MOTION OF APPRECIATION

Doctor Henry Ruth then extended a mo-

tion of appreciation to the Local Arrangements Committee for the outstanding hospitality which they had extended. The motion was seconded by Doctor Krakow and upon vote was unanimously carried.

#### ADJOURNMENT

There being no further business to come before the House, Doctor Knight as President of the American Society of Anesthesiologists and as Chairman of the House of Delegates, declared its adjournment at 4:00 p.m.

Respectfully submitted,

J. EARL REMLINGER, JR., M.D.,  
*Secretary*
